# Supplementary material for: Understanding the effect of the concentration of LiNO3 salt in Li–O2 batteries
Source: Royal Society of Chemistry journal article supplement (doi:10.1039/c9ta05082e), 2019-01-01
Supplement: c9ta05082e1.pdf [file c9ta05082e1.pdf]

## Supporting information

Understanding the effect of concentration LiNO<sub>3</sub> salt in Li-O<sub>2</sub> batteries

Eunjoo Yoo\*, Yu Qiao and Haoshen Zhou\*

National Institute of Advanced Industrial Science and Technology

Umezono 1-1-1, Central 2, Tsukuba, Ibaraki 305-8568 (Japan)

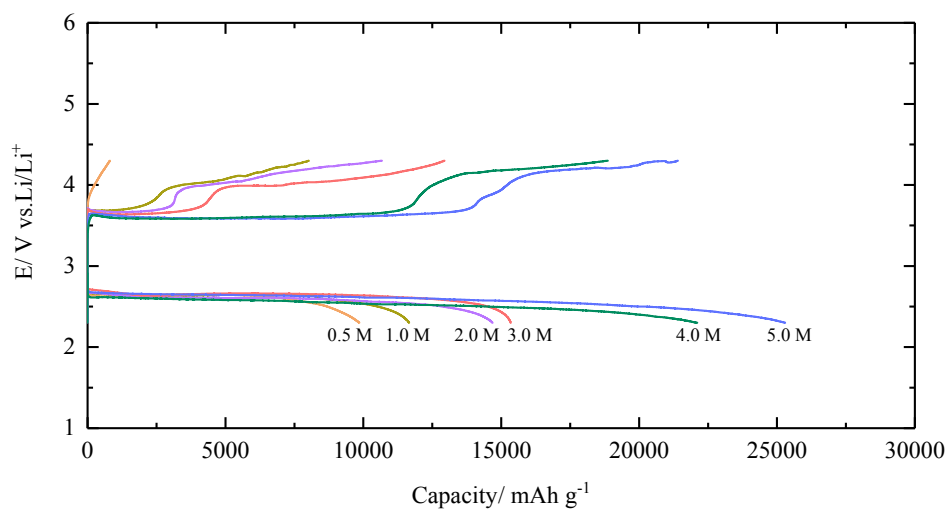

**Fig. S1.** Full discharge-charge profile as a function of different concentration LiNO<sub>3</sub> in Li-O<sub>2</sub> batteries at a current density of 500 mA g<sup>-1</sup> and a cut-off voltage window from 2.3 to 4.5 V vs.Li/Li<sup>+</sup>

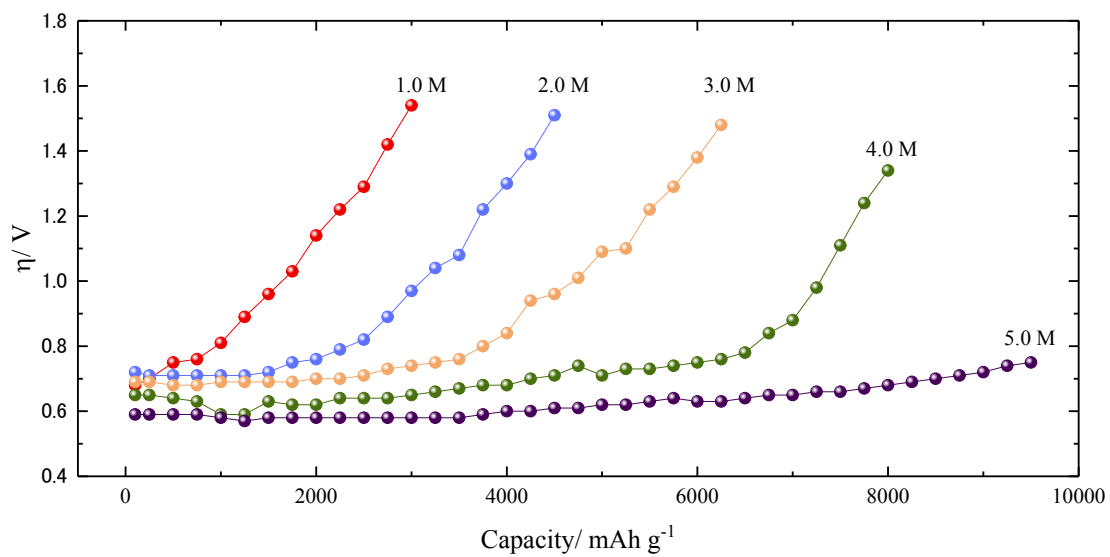

**Fig. S2.** Charge overpotential as a function of capacities for different concentration  $\text{LiNO}_3$  in  $\text{Li-O}_2$  batteries
